# Supplementary material for: Wrapping the walls of n-TiO2 nanotubes with p-CuInS2 nanoparticles using pulsed-electrodeposition for improved heterojunction photoelectrodes
Source: Royal Society of Chemistry journal article supplement (doi:10.1039/c1cc13738g), 2011-01-01
Supplement: c1cc13738g.pdf [file c1cc13738g.pdf]

## Electronic Supplementary Information

### **Wrapping the walls of n-TiO<sub>2</sub> nanotubes with p-CuInS<sub>2</sub> nanoparticles using pulsed-electrodeposition for improved heterojunction photoelectrodes**

Jung-Ho Yun<sup>a</sup>, Yun Hau Ng<sup>a</sup>, Shujuan Huang<sup>b</sup>, Gavin Conibeer<sup>b</sup> and Rose Amal<sup>a\*</sup>

<sup>a</sup>ARC Centre of Excellence for Functional Nanomaterials, School of Chemical Engineering,

<sup>b</sup>ARC Photovoltaics Centre of Excellence, the University of New South Wales, Sydney NSW  
2052 Australia.

Fax: +612-9385-5966; Tel: +612-9385-4361; Email: [r.amal@unsw.edu.au](mailto:r.amal@unsw.edu.au)

#### **Experimental details**

*Anodization of TiO<sub>2</sub> nanotube (TNT) array:* The TNT array was prepared by anodizing Ti foil (99.7 %, Aldrich) with 20 x 20 x 0.127 mm dimension in ethylene glycol based fluoride electrolyte. The Ti foils were first cleaned with acetone in mild sonication and Milli-Q water followed by vacuum drying before anodization. The electrolytes were prepared by mixing ethylene glycol (> 99 %, Aldrich) and 0.5 wt. % of NaF (99 %, Ajax Chemicals) with water of 5 wt. %. A two-electrode system was used for anodization, with Ti foil as the anode, and platinum plate and wire as the cathode. An in-house designed sealed anodic cell was used as the reactor. A constant distance was maintained between electrodes, and the area of anode exposed to the electrolyte was controlled. A programmable DC power supply (PST-3201, GW Instek) interfaced with a computer was used to monitor the anodization current density. An applied potential of 60 V and an anodization time of 1 h were employed. After anodization, the TNT array samples were rinsed with Milli-Q water in a sonication bath to remove debris of broken tubes, and dried at 110 °C for 1 h, followed by calcination at 450 °C for 3 h with a ramping rate of 5 °C min<sup>-1</sup> in air.<sup>[1]</sup>

*Fabrication of CuInS<sub>2</sub>-TiO<sub>2</sub> nanotube (CIS-TNT) heterojunction photoelectrode:* To fabricate CIS-TNT p-n heterojunction photoelectrode, prior to deposition of CIS onto the TNT, the calcined TNT array was placed in the sealed anodic cell, in which the CIS was deposited electrochemically by applying a square pulse with a switch to a cathodic pulse (-2 V, 200 ms) and short circuit pulse (0 V, 200 ms) ; the pulse was employed by a function generator (TG4001, Thurlby Thandar Instruments). The CIS precursor solution was prepared with CuCl<sub>2</sub>, InCl<sub>3</sub>, and Na<sub>2</sub>S<sub>2</sub>O<sub>3</sub> in molar ratio of 1 : 0.8 ~ 1.65 : 4 ~ 10. After CIS deposition, the

CIS-TNT array samples were annealed at 500 °C for 1 h with ramping rate of 5 °C min<sup>-1</sup> in a tube furnace under Ar gas stream.

*Photoelectrochemical measurement:* Cathodic or anodic current analyses of pure CIS samples prepared by using different precursor molar ratio were taken in 0.1 M LiCl at room temperature at short-circuit condition using Autolab potentiostat (model PGSTAT302N). Photocurrent density analyses of TNT and CIS-TNT samples were performed in 0.1 M Na<sub>2</sub>S and 0.02 M Na<sub>2</sub>SO<sub>3</sub> under 1 V at room temperature. Prior to measurement, all electrolytes were purged with Ar gas for 10 mins. In all measurements, Pt and Ag/AgCl were employed as counter and reference electrode, respectively. Xe lamp with cut-off filter (420 or 435 nm) was used as the light source.

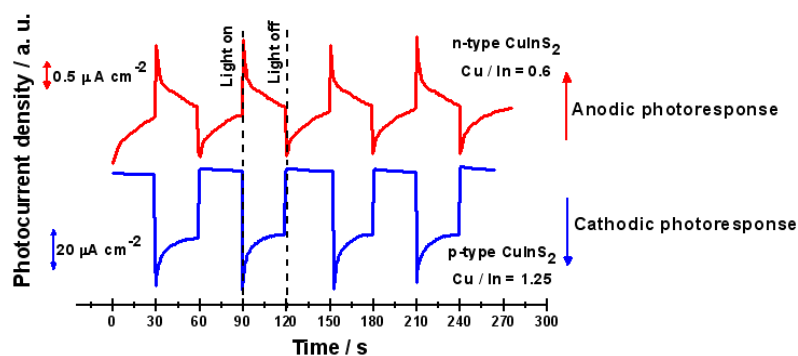

**Figure S1.** Visible light responses of CIS layers coated on FTO conductive glass with different molar ratio of CIS precursors in 0.1 M LiCl under short circuit condition (The light source was 300 W Xe-lamp with UV cut off filter ( $\lambda \geq 420$  nm)).

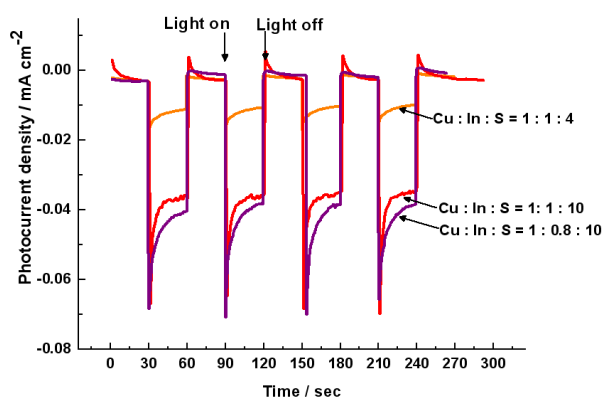

**Figure S2.** Photocurrent density of CIS layers controlled by electrodeposition with different molar ratio of Cu : In : S in CIS precursor solution. in 0.1 M LiCl under short circuit condition (The light source was 300 W Xe-lamp with UV cut off filter ( $\lambda \geq 420$  nm)).

Although the concentration of S in the precursors is not critical in determining the type of semiconductor, the presence of a higher amount of S generates higher photocurrent density.

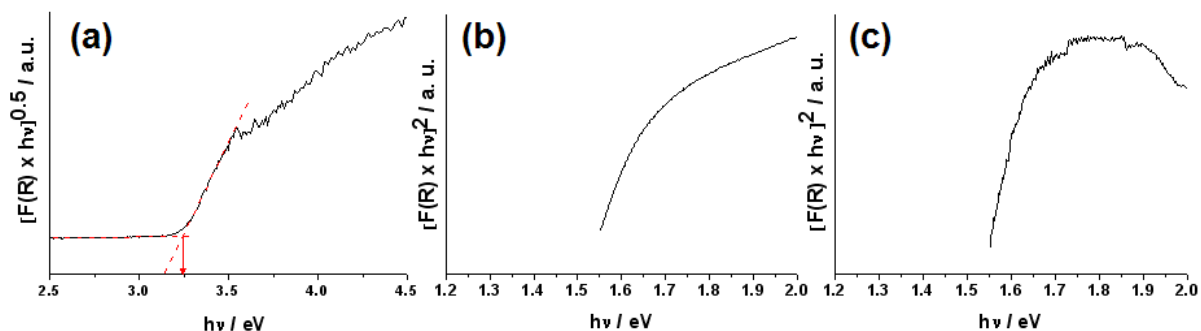

**Figure S3.** Diffuse reflectance UV spectra of (a) pure TNT array, (b) pulsed-electrodeposited-pure CIS layer on Ti foil, and (c) pulsed-electrodeposited CIS-TNT array in molar ratio of Cu : In : S = 1 : 0.8 : 10 in CIS precursor solution.

The pure TNT exhibits wide band gap energy with UV-only activation while CIS-TNT shows extended absorption into visible light region, similar with that of the pure CIS sample.

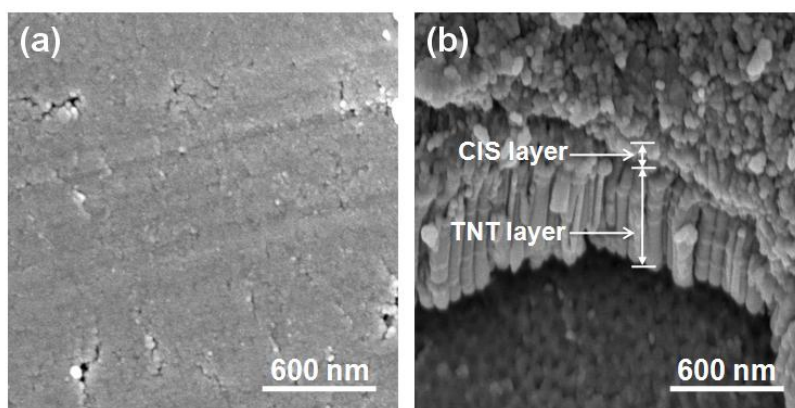

**Figure S4.** (a) Top and (b) cross-section SEM images of CIS-TNT array by non-pulsed electrodeposition.

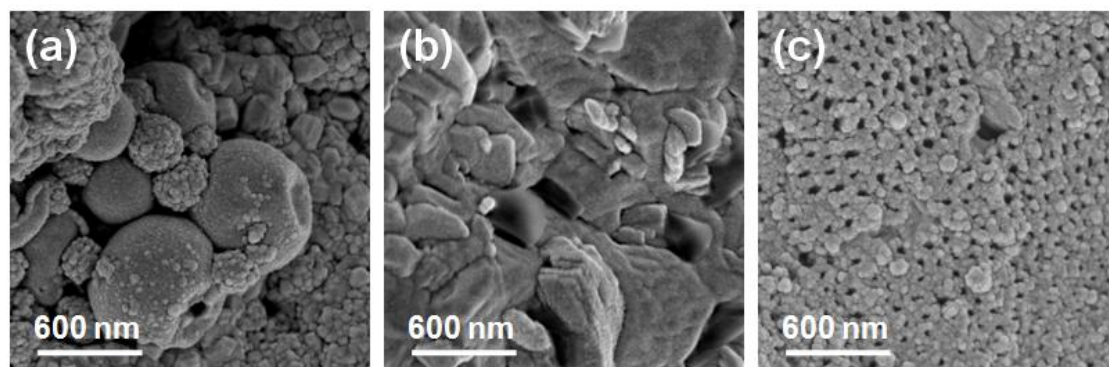

**Figure S5.** Top view SEM images of CIS-TNT array with different pulse relaxation in pulsed-electrodeposition with the molar ratio of Cu : In : S = 1 : 0.8 : 10 in CIS precursor solution : (a) 20 ms pulse, (b) 50 ms pulse, (c) 200 ms pulse.

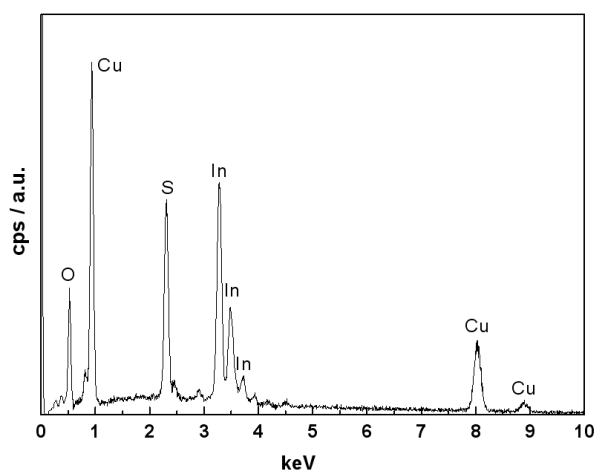

**Figure S6.** EDX analysis of the pulsed-electrodeposited CIS-TNT array with the molar ratio of Cu : In : S = 1 : 0.8 : 10 in CIS precursor solution.

Energy dispersive X-ray (EDX) spectrum was obtained from the bulk CIS-TNT bundle. This reveals that the nanoparticles deposited on the nanotubes are mainly composed of Cu, In and S.

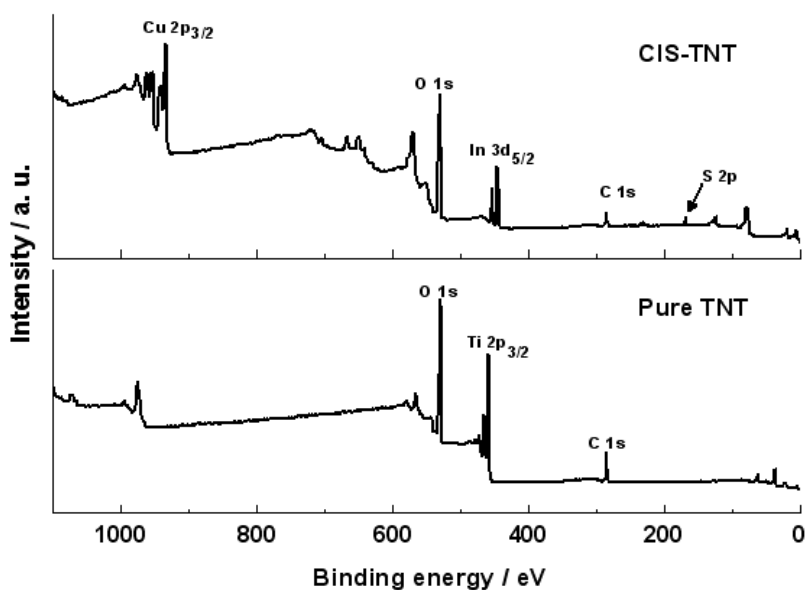

**Figure S7.** XPS survey spectra of CIS-TiO<sub>2</sub> array using pulsed-electrodeposition with the molar ratio of Cu : In : S = 1 : 0.8 : 10 and TiO<sub>2</sub> array prepared by anodising condition of 60 V and 1 h in ethylene glycol based-electrolyte containing 0.5 wt. % NaF and 5 wt. % water.

In **Figure S7**, XPS survey spectra of CIS-TiO<sub>2</sub> shows the existence of Cu, In, S, C, and O elements. Binding energies of Cu 2p<sub>3/2</sub>, In 3d<sub>5/2</sub>, S 2p, C 1s and O 1s are 932 eV, 952 eV, 169 eV, 286 eV, and 531 eV, respectively. The binding energies of Cu 2p<sub>3/2</sub>, In 3d<sub>5/2</sub>, and S 2p indicate a good agreement with those of CIS composite.<sup>[2]</sup> On the other hand, Ti 2p was not detected in the XPS spectrum of CIS-TiO<sub>2</sub> layer. While TiO<sub>2</sub> is detected in the bulk crystal structure analysis in XRD, the absence of Ti element in XPS surface analysis confirms the CIS layer is covered on the TNTs.

## References

1. J. -H. Yun, Y. H. Ng, C. Ye, A. J. Mozer, G. G. Wallace, R. Amal, *ACS Appl. Mater. Interfaces.*, 2011, **3**, 1585.
2. A. Katerski, A. Mere, V. Kazlauskienė, J. Miskinis, A. Saar, L. Matisen, A. Kikas, M. Krunkas, *Thin Solid Films*, 2008, **516**, 7110.
